# Supplementary material for: Degradation of lipid droplets by chimeric autophagy-tethering compounds
Source: PubMed Central journal article supplement (PMC8410765; doi:10.1038/s41422-021-00532-7), 2021-07-08
Supplement: 41422_2021_532_MOESM2_ESM.pdf [file 41422_2021_532_MOESM2_ESM.pdf]

Fig.S2

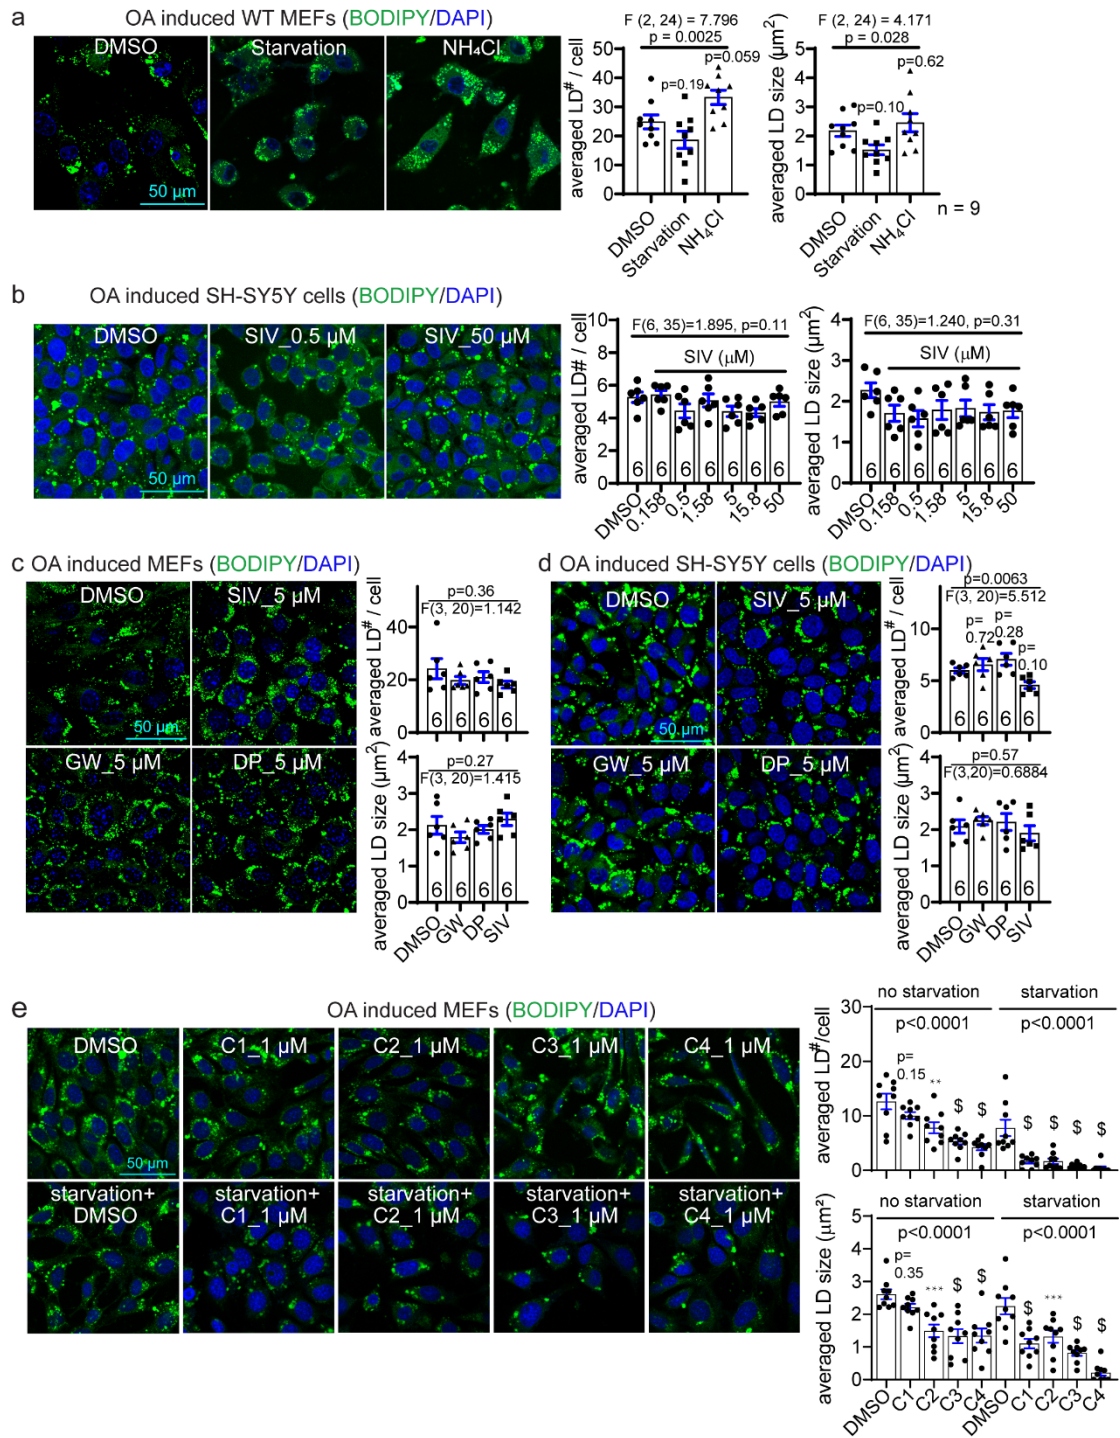

**Fig. S2 LC3-binding compounds or LD probes alone did not influence BODIPY signals.** **a** Representative images and quantifications of the BODIPY493/503 staining of the OA-induced LDs in wild-type MEFs with the indicated treatments: starvation (medium replacement with EBSS for 4 hours and then in normal medium for 20 hours) to induce global autophagy, or treatment with 10 mM NH<sub>4</sub>Cl to inhibit baseline autophagy flux. Note that the treatment was both performed after the 6-hour OA induction of LDs and the DMSO group were from the same ones in Fig. 2a. The ANOVA test results were significant, but the post-hoc analysis did not show significant difference compared to the DMSO group. **b** Representative images and quantifications of the BODIPY493/503 staining of the OA-induced LDs in the SH-SY5Y cells treated with the LD probe SIV at concentrations up to 50 μM, which did not lower the levels of LDs. **c-d** Representative images and quantifications of the BODIPY493/503 staining of the OA-induced LDs in the indicated cells treated LC3-binding moieties or the LD-probe alone. n = 6, independently plated wells. **e** Similar to D, but with or without starvation (medium replacement with the indicated compounds in EBSS for 4 hours, and then changed to normal medium with the same concentration of indicated compounds for 20 hours). n=9 for each group. The LD number per cell and averaged LD size in each field were quantified by ImageJ (particle analysis) in a blinded manner. The statistical analyses were performed by one-way ANOVA (F/degree of freedom/p values have been indicated for each plot) and Dunnett's post-hoc tests (the corrected p values compared to the DMSO group, if the ANOVA tests were significant). The n numbers indicate independently plated wells. \*\*: p<0.01, \*\*\*: p<0.001, \$: p<0.0001. The exact p values have been indicated if space allows.
